# Supplementary material for: Using horizontal-to-vertical spectral ratios to construct shear-wave velocity profiles
Source: Copernicus journal article supplement (doi:10.5194/se-11-2015-2020), 2020-11-09
Supplement: Supplementary file 1 [file se-11-2015-2020-supplement.zip]

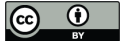

## *Supplement of*

# **Using horizontal-to-vertical spectral ratios to construct shear-wave velocity profiles**

**Janneke van Ginkel et al.**

*Correspondence to:* Janneke van Ginkel ([j.a.van.ginkel@rug.nl](mailto:j.a.van.ginkel@rug.nl))

- se-11-2015-2020-supplement-title-page.pdf
- \_\_MACOSX
  - supporting\_information
    - \* .\_Velocities\_NSG.csv
    - \* .\_supporting\_information.doc
- supporting\_information
  - Velocities\_NSG.csv
  - plot\_NSG\_velocities.m
  - supporting\_information.doc

The copyright of individual parts of the supplement might differ from the CC BY 4.0 License.
